# Supplementary material for: Clinical experience and workflow challenges with magnetic resonance-only radiation therapy simulation and planning for prostate cancer
Source: PubMed Central journal article supplement — Phys Imaging Radiat Oncol. 2020 Oct 13;16:43–9. doi: 10.1016/j.phro.2020.09.009 (PMC7598055; doi:10.1016/j.phro.2020.09.009), 2020-10-13
Supplement: NIHMS1639210-supplement-1.pdf [file NIHMS1639210-supplement-1.pdf]

477  
478  
479  
480  
481

**Supplementary Table 1 Summary of patient clinical parameters**

| # OF PATIENTS               |                         | 585                |
|-----------------------------|-------------------------|--------------------|
| <b>AGE</b>                  |                         | 67.8 (44 - 90)     |
| <b>CLINICAL T STAGE</b>     | T1/T1a/T1c              | 2/4/263            |
|                             | T2/T2a/T2b/T2c          | 9/75/41/26         |
|                             | T3/T3a/T3b              | 3/66/49            |
|                             | T4/T4a                  | 16/1               |
|                             | Tx                      | 5                  |
|                             | *unknown                | 12                 |
| <b>INITIAL PSA</b>          |                         | 15.6 (0.05 - 1659) |
| <b>GLEASON SCORE</b>        | 6                       | 32                 |
|                             | 7 (3+4)                 | 232                |
|                             | 7(4+3)                  | 161                |
|                             | 8(4+4, 3+5)             | 67                 |
|                             | 9                       | 84                 |
|                             | 5+5                     | 3                  |
|                             | *unknown                | 6                  |
| <b>PROSTATE VOLUME (CC)</b> |                         | 45.6 (11 - 142)    |
| <b>DOSE PRESCRIPTION</b>    | 800x5/750x5/600x5/500x5 | 318                |
|                             | 270x26                  | 18                 |
|                             | 180x40/180x25+180x15    | 249                |

482  
483  
484

\*unknown T stage or Gleason score due to metastatic or recurrent disease

485  
486  
487  
488  
489  
490  
491

Contours drawn on a T2w MRI for an example patient

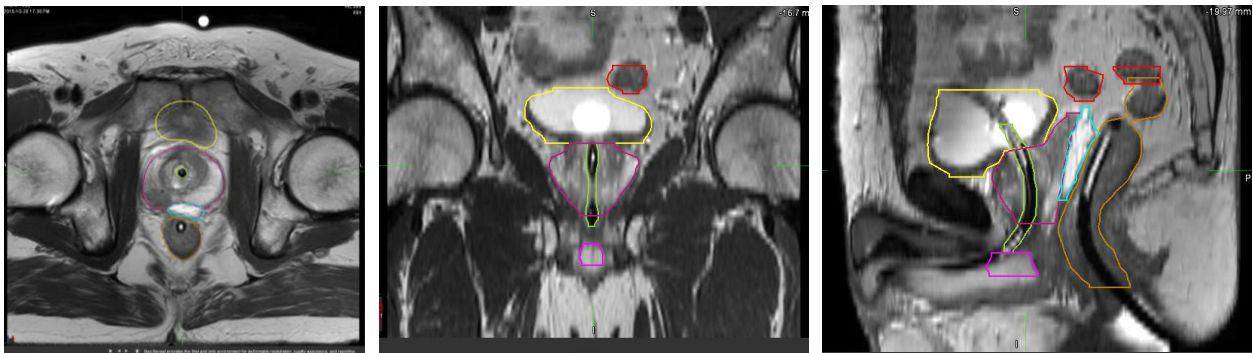

Isodose lines displayed on a T2w MRI for an example patient

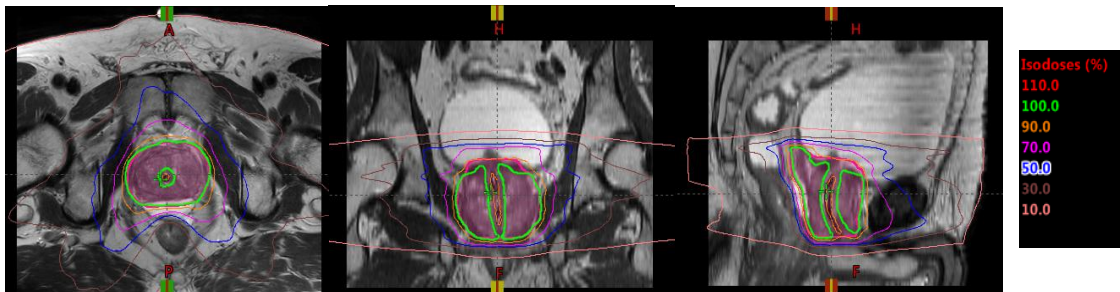

492

493 Supplementary Figure 1: Contours and dose distributions projected onto axial 2D T2w MRI for peer  
494 review during chart rounds in an MR-only workflow

Blurry acquisition

2D T2w MRI

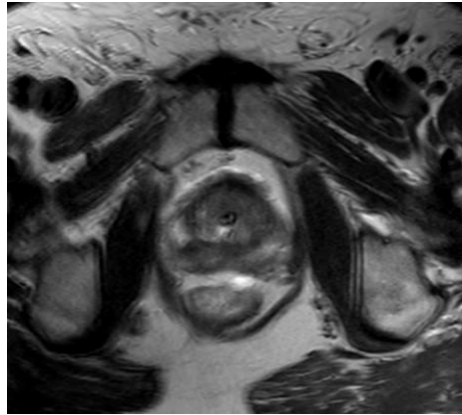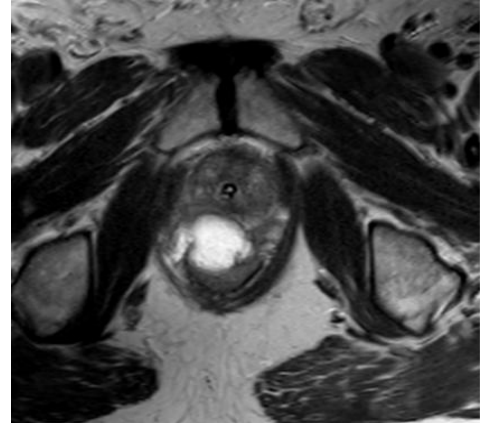

3D bFFE

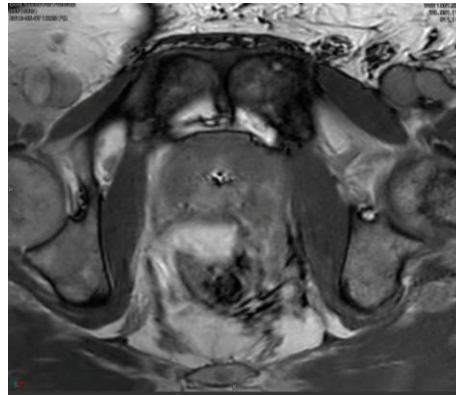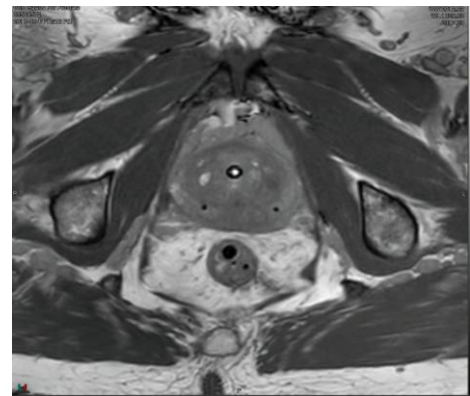

495

496 Supplementary Figure 2: Patient motion resulting in image blur on T2w MRI (top left) and 3D-bFFE MRI  
497 (bottom left). Repeat acquisition (right column) improved the motion artifact.

498

499

Before

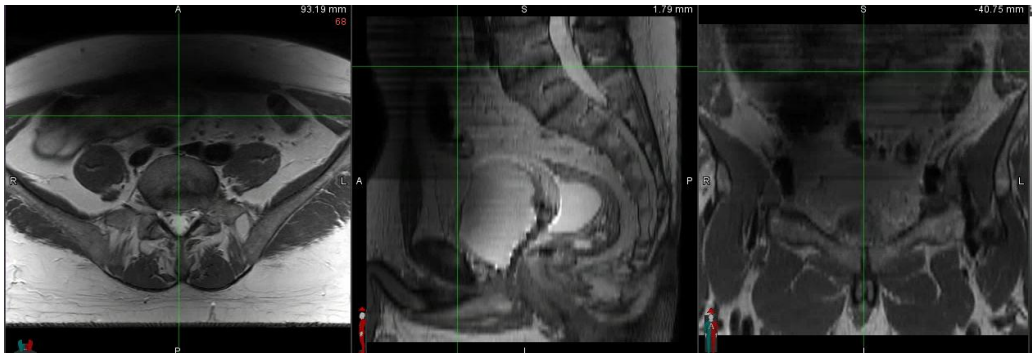

After

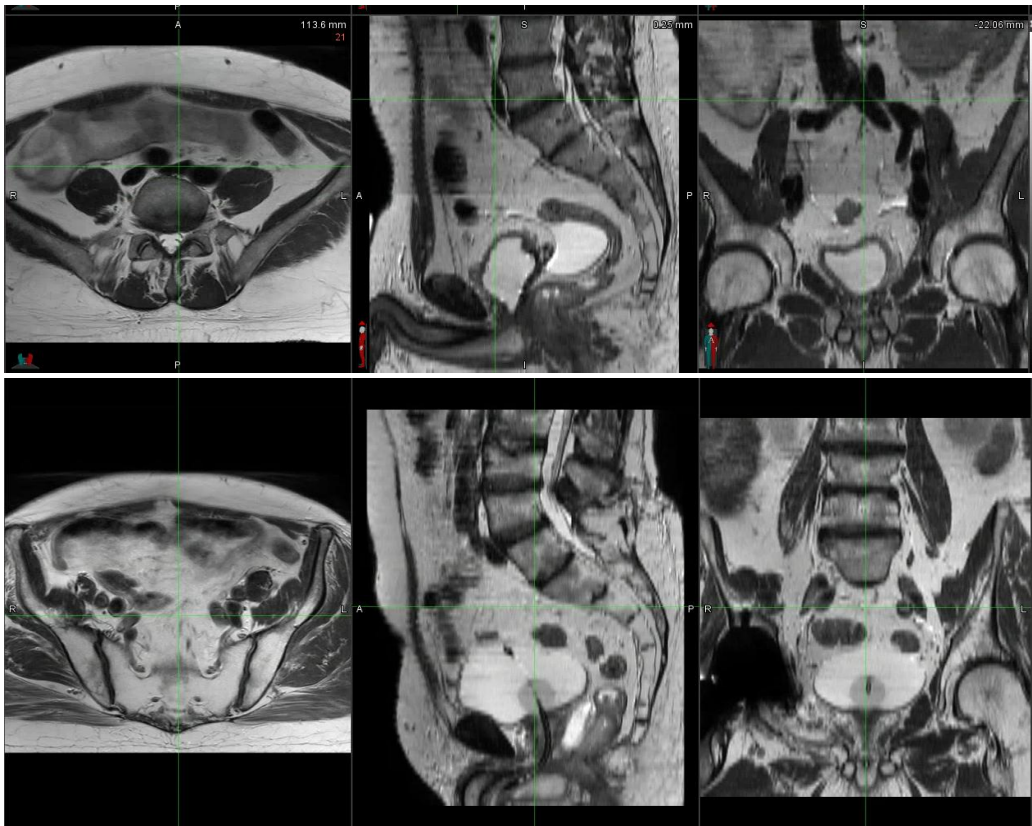

500

501 Supplementary figure 3: Effect of B1 inhomogeneity on large FOV T2w TSE acquisition. Before: A  
502 single acquisition with two stacks resulting in inhomogeneity due to dielectric effect. After: Acquiring  
503 two stacks separately using adaptive inhomogeneity on each individual stack. The stacks were combined  
504 using Philip's Mobiview™ software.

## Initial bowel check

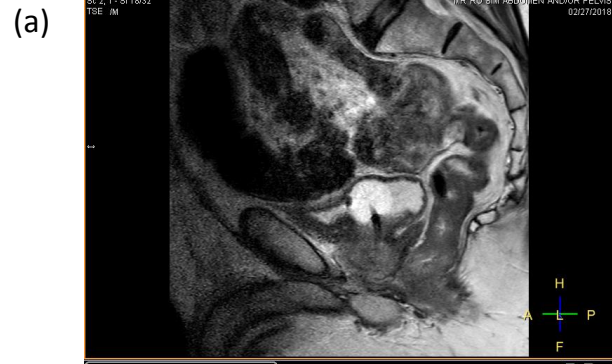

## bowel check after using rectal catheter

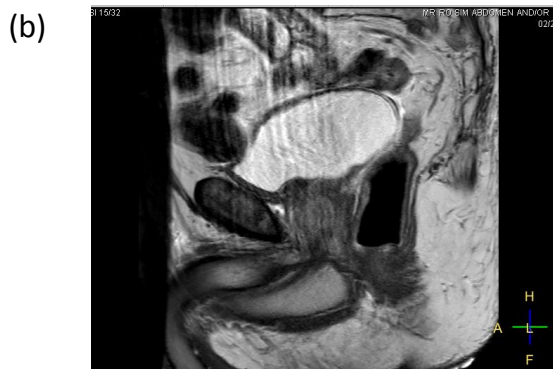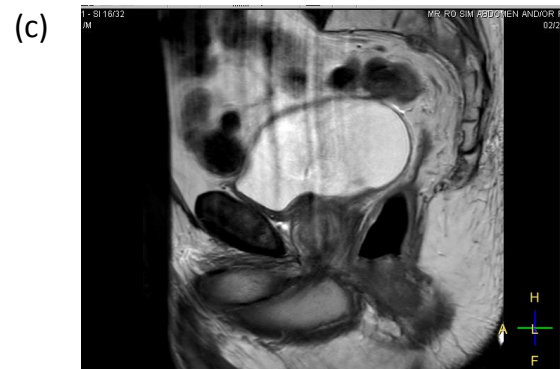

505

506 Supplementary figure 4: Example of significant changes to bowel gas challenge during MR-only  
507 simulation despite repeated use of a rectal catheter. (a): initial bowel check. (b): bowel check after rectal  
508 catheter implementation. (c): Bowel gas after second rectal catheter implementation

509

510

Gold seed MRI

MRCAT source W

T2w MRI

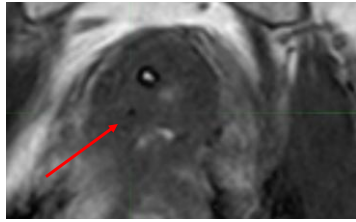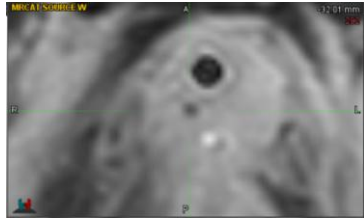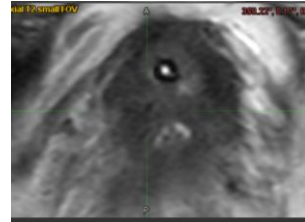

0.9x5 mm  
markers

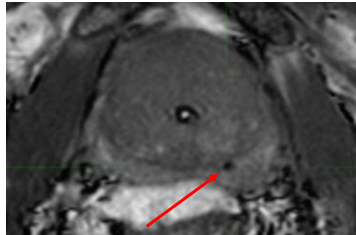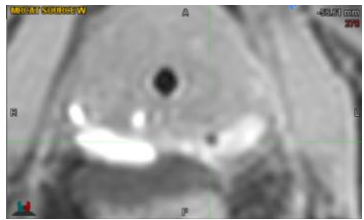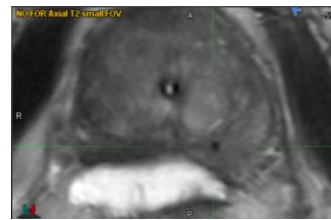

1.1x5 mm  
markers

511

512 Supplementary Figure 5: Visibility of various size gold seed fiducial markers on different MRIs

513
